# Supplementary material for: MYB mediates downregulation of the colorectal cancer metastasis suppressor heterogeneous nuclear ribonucleoprotein L‐like during epithelial‐mesenchymal transition
Source: PubMed Central journal article supplement — Cancer Sci. 2021 Jul 29;112(9):3846–55. doi: 10.1111/cas.15069 (PMC8409424; doi:10.1111/cas.15069), 2021-07-29
Supplement: CAS-112-3846-s003.pdf [file CAS-112-3846-s003.pdf]

(A)

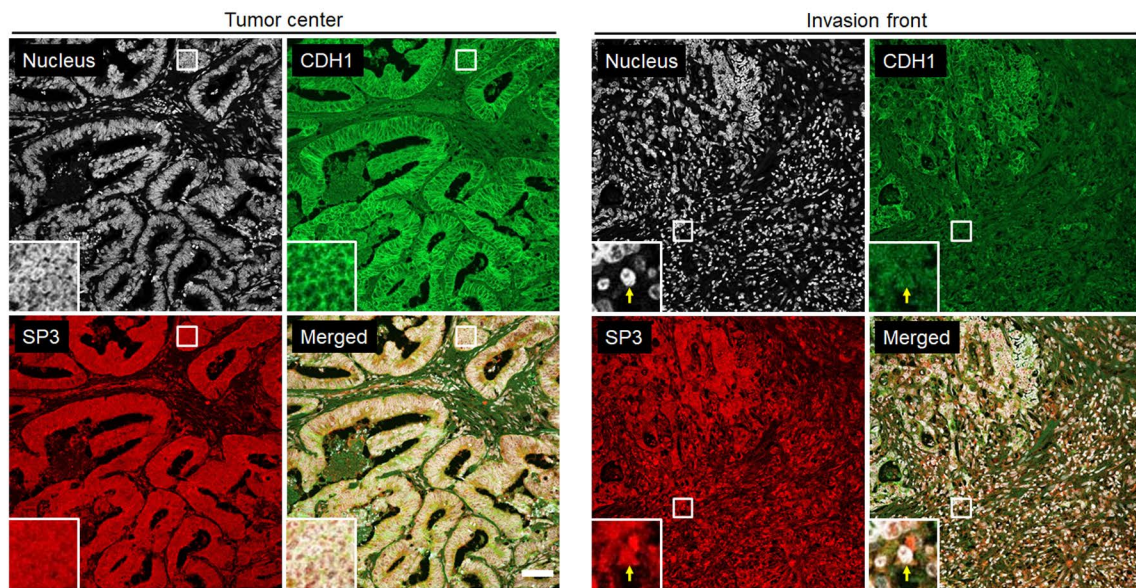

(B)

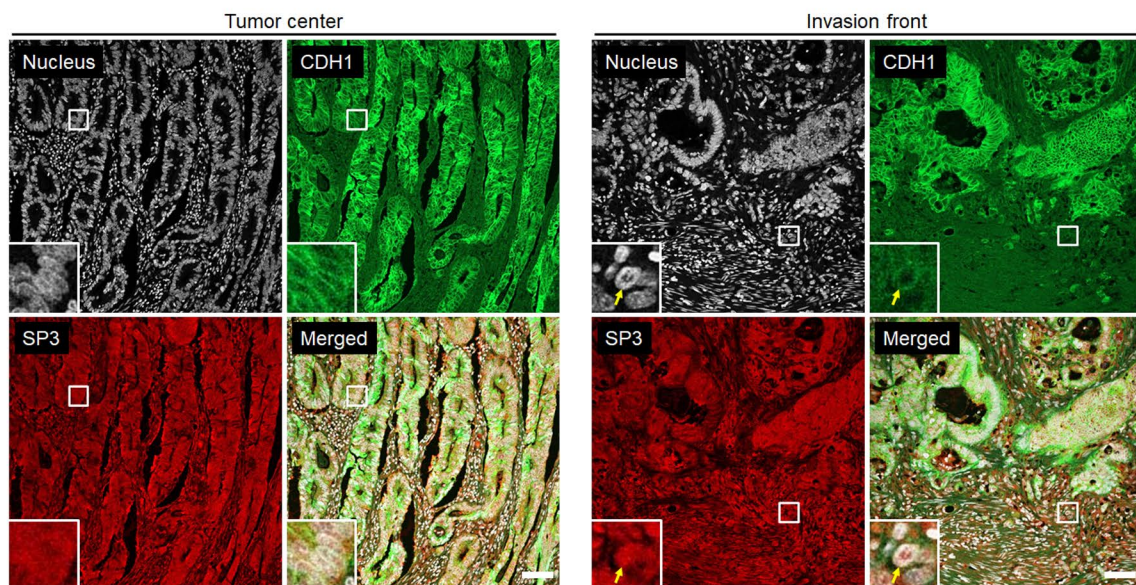

**Figure S6**

Immunohistochemical analysis of SP3 in clinical CRC samples. A and B, Immunostaining of SP3 (green) and CDH1 (red) in paraffin-embedded sections of primary colon cancer from the same cases as shown in Figure S5. Bars, 20  $\mu$ m.
