# Supplementary material for: MYB mediates downregulation of the colorectal cancer metastasis suppressor heterogeneous nuclear ribonucleoprotein L‐like during epithelial‐mesenchymal transition
Source: PubMed Central journal article supplement — Cancer Sci. 2021 Jul 29;112(9):3846–55. doi: 10.1111/cas.15069 (PMC8409424; doi:10.1111/cas.15069), 2021-07-29
Supplement: CAS-112-3846-s006.pdf [file CAS-112-3846-s006.pdf]

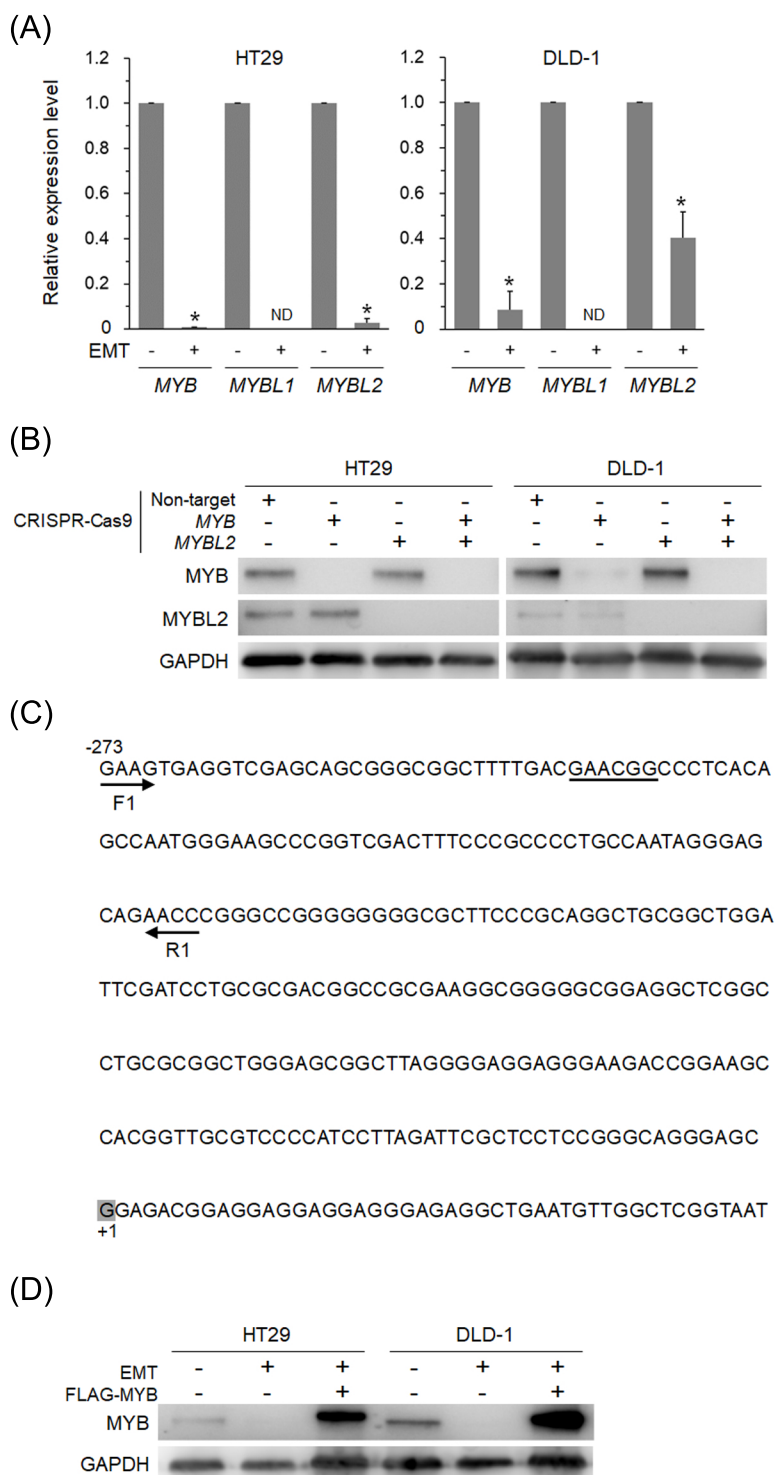

## Figure S2

Assessment of the status of MYB family proteins. A, Quantitative RT-PCR analysis for expression levels of *MYB*, *MYBL1*, *MYBL2* in HT29 and DLD-1 cells with or without EMT-induction. \* $P < 0.001$ ; ND, not detected. B, Western blot analysis for MYB and MYBL2 to validate the effect of CRISPR-Cas9-mediated knockout. C, Locations of CHIP-PCR primers in the *HNRNPLL* promoter. F1, forward primer; R1, reverse primer. D, Western blot analysis for expression of FLAG-MYB transduced in HT29 and DLD-1 cells.
