# Supplementary material for: MYB mediates downregulation of the colorectal cancer metastasis suppressor heterogeneous nuclear ribonucleoprotein L‐like during epithelial‐mesenchymal transition
Source: PubMed Central journal article supplement — Cancer Sci. 2021 Jul 29;112(9):3846–55. doi: 10.1111/cas.15069 (PMC8409424; doi:10.1111/cas.15069), 2021-07-29
Supplement: CAS-112-3846-s007.pdf [file CAS-112-3846-s007.pdf]

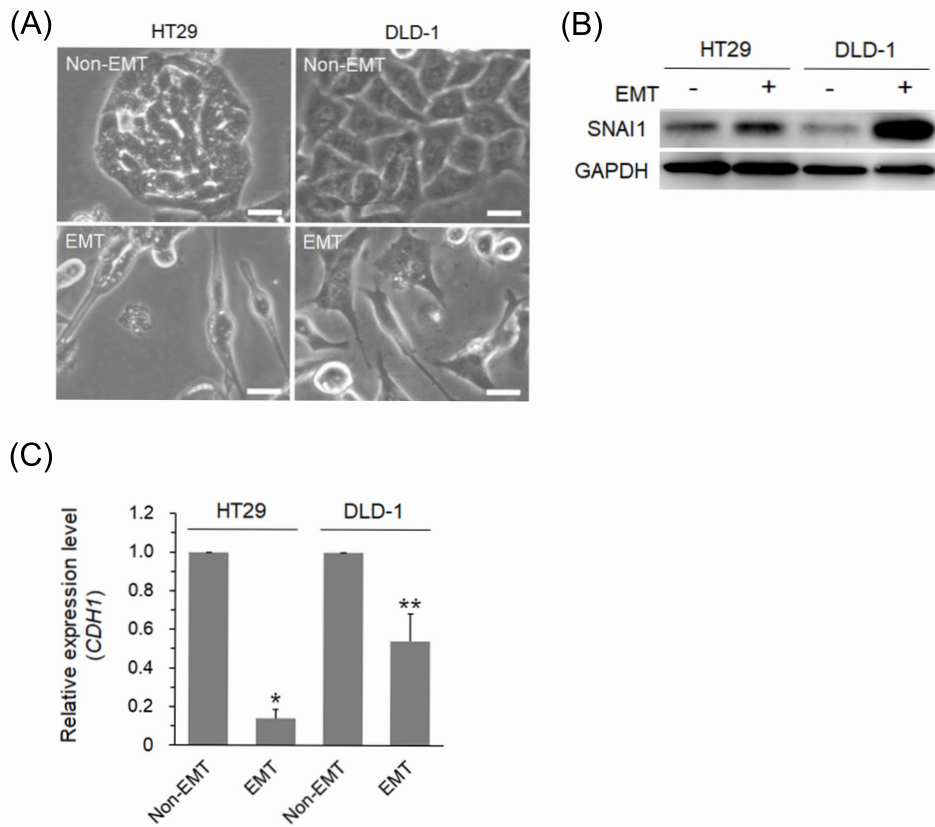

### Figure S1

Validation of EMT-induction. A, Phase contrast micrographs of HT29 and DLD-1 cells treated with EGF and bFGF in serum-depleted medium for 7 days. Bars, 20  $\mu$ m. B and C, Western blot for SNAI1 (B) and quantitative RT-PCR for CDH1 (C) in HT29 and DLD-1 cells with or without EMT-induction. \* $P < 0.001$ ; \*\* $P < 0.01$ .
